# Supplementary material for: Effects of Biochar and Plant Growth-Promoting Rhizobacteria on Plant Performance and Soil Environmental Stability
Source: MDPI journal article supplement (doi:10.3390/su141710922), 2022-09-01
Supplement: s1 [file s1]

## Supplementary Information

**Figure S1** The research site was plowed with a cultivator in July 2018 and then divided into three experimental units of  $46\text{ m} \times 10\text{ m}$  each. Each experimental unit was further divided into four blocks of  $10\text{ m} \times 10\text{ m}$ , separated by 2-m buffer strips and one block was kept as the control while the other three were treated with biochar and PGPR. Each block consisted of 25 plots, each measuring  $2\text{ m} \times 2\text{ m}$ . To ensure no contamination in the blocks, a minimum distance of 2 m was kept between any two blocks.

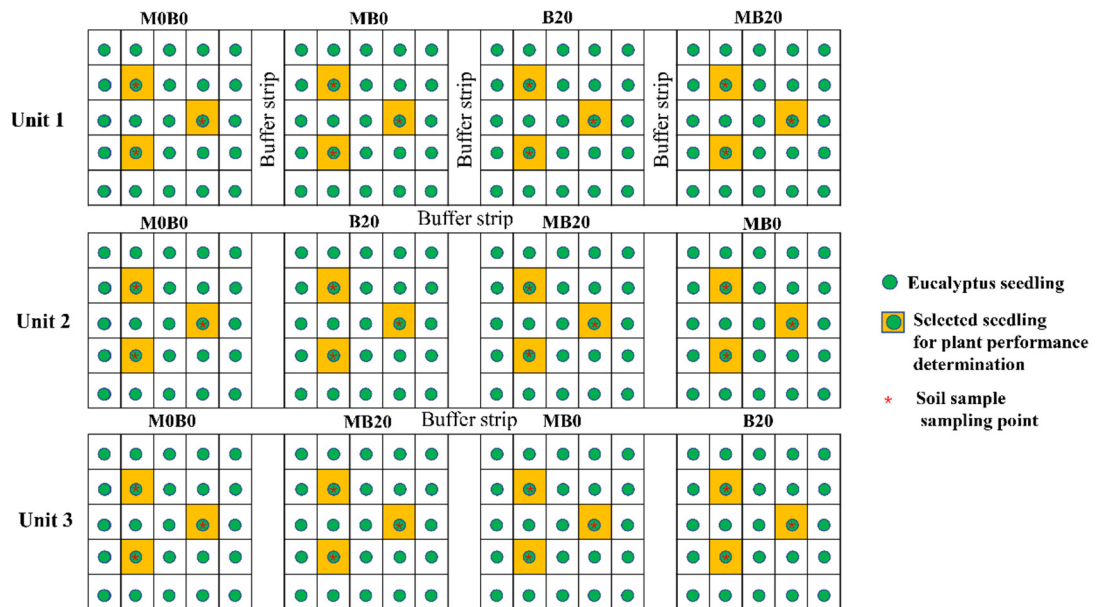

**Figure S2** Carbon source type in the Biolog-Eco plate. There are 96 wells in the Biolog-Eco plate, and further divided into 3, 32 well plots. The plot is considered the unit of replication, and the first well of each plot is set as the blank control without carbon source, while other 31 wells contain tetrazolium blue and specified carbon sources.

|        |     |     |     |        |     |     |     |        |     |     |     |
|--------|-----|-----|-----|--------|-----|-----|-----|--------|-----|-----|-----|
| C0     | C8  | C16 | C24 | C0     | C8  | C16 | C24 | C0     | C8  | C16 | C24 |
| C1     | C9  | C17 | C25 | C1     | C9  | C17 | C25 | C1     | C9  | C17 | C25 |
| C2     | C10 | C18 | C26 | C2     | C10 | C18 | C26 | C2     | C10 | C18 | C26 |
| C3     | C11 | C19 | C27 | C3     | C11 | C19 | C27 | C3     | C11 | C19 | C27 |
| C4     | C12 | C20 | C28 | C4     | C12 | C20 | C28 | C4     | C12 | C20 | C28 |
| C5     | C13 | C21 | C29 | C5     | C13 | C21 | C29 | C5     | C13 | C21 | C29 |
| C6     | C14 | C22 | C30 | C6     | C14 | C22 | C30 | C6     | C14 | C22 | C30 |
| C7     | C15 | C23 | C31 | C7     | C15 | C23 | C31 | C7     | C15 | C23 | C31 |
| Plot 1 |     |     |     | Plot 2 |     |     |     | Plot 3 |     |     |     |

C0: Blank control  
C1: Methyl pyruvate  
C2: Tween 40  
C3: Tween 80  
C4: α-cyclodextrin  
C5: Glycogenin  
C6: D-cellose  
C7: α-D-lactose  
C8: β- methyl D- glycoside  
C9: D-xylose  
C10: L-erythritol  
C11: D-mannitol  
C12: N-acetyl-D-glucosamine  
C13: D-glucosaminicacid  
C14: Glucose-1-phosphate  
C15: D, L-α-glycerol  
C16: D-glactonicacid γ lactone  
C17: D-galactose  
C18: 2-hydroxy-benzoic acid  
C19: 4-hydroxy-benzoic acid  
C20: r-hydroxybutyric acid  
C21: Itaconic acid  
C22: α-ketobutyric acid  
C23: D-malic acid  
C24: L-arginine

C25: L-asparagine  
C26: L-phenylalanine  
C27: L-serine  
C28: L-threonine  
C29: Glycyl-L-glutamate  
C30: Phenylethylamine  
C31: Putrescine

**Formula S1:**  $AWCD = \sum(C_i - R_i)/n$ ;  $C_i$  is the absorbance value of each carbon source well,  $R_i$  is the absorbance value of each blank control well,  $n$  is the number of carbon source wells.

**Formula S2:** Simpson index ( $D$ ) =  $1 - \sum P_i^2$ ;  $P_i = (C_i - R_i) / \sum(C_i - R_i)$ .

**Formula S3:** Shannon index ( $H$ ) =  $-\sum P_i \times \ln(P_i)$ ;

**Formula S4:** McIntosh index ( $U$ ) =  $\sqrt{\sum(C_i - R_i)^2}$ .
