# Supplementary material for: Effects of Biochar and Plant Growth-Promoting Rhizobacteria on Plant Performance and Soil Environmental Stability
Source: MDPI journal article supplement (doi:10.3390/su141710922), 2022-09-01
Supplement: s1 [file s1]

Archive with 1 entries (1 files):
- sustainability-1845683-supplementary.pdf
